# Supplementary material
Source: publisher site journal article supplement (https://www.dovepress.com/article/supplementary_file/579561/579561_Supplementary%20Table%20_1.xlsx)
Supplement: Supplementary file 1 [file 579561_Supplementary%20Table%20_1.xlsx]

## Sheet: Supplementary Table 1
Supplementary Table 1. Detailed list of multiple RET fusion events in 31 patients
fusion partner	fusion site	breakpoint	sample	supporting read counts	RET kinase domain retention	Classification (A, B and C)
KIF5B:RET	K15:R12	10:32313329_10:43610640	S087	201	Yes	A
FAM25B:RET	Fintergenic:R12	10:47358107_10:43610506	S087	17	Yes	C
CCDC6:RET	C1:R12	10:61661407_10:43611767	S085	297	Yes	A
C10orf40:RET	C2:R8	10:61718849_10:43607202	S085	211	Yes	B
RET:TFAM	R7:Tintergenic	10:43606721_10:60210570	S085	203	No	C
RET:BICC1	R11:Bintergenic	10:43611336_10:60251050	S085	201	No	C
CARNMT1-AS1-RET	C5'UTR:R12	9:77587812_10:43611145	S018	69	Yes	B
CCDC6-RET	C1:R12	10:43611248_10:61633467	S018	214	Yes	A
RET-intergenic(HECTD2-AS1,PPP1R3C)	R11:intergenic	10:43610742_10:93378639	S019	76	No	C
CCDC6-RET	C1:R12	10:43611501_10:61642141	S019	22	Yes	B
RET-intergenic(DRGX,ERCC6)	R11:intergenic	10:43611807_10:50620455	S020	487	No	C
intergenic(ZKSCAN2,HS3ST4)-RET	intergenic:R12	16:25310912_10:43611808	S020	408	Yes	C
RET-intergenic(EXOC7,FOXJ1)	R11:intergenic	10:43610397_17:74122674	S022	56	No	C
PRKAR1A-RET	P7:R12	17:66522997_10:43610712	S022	49	Yes	B
RET-intergenic(ADGRL3-AS1,TECRL)	R11:intergenic	4:64485084_10:43610993	S023	99	No	C
intergenic(MAP3K8,LYZL2)-RET	intergenic:R12	10:30835487_10:43610996	S023	66	Yes	C
RET-ARHGAP12	R11:A12	10:32114092_10:43610272	S025	136	No	B
KIF5B-RET	K15:R12	10:32316149_10:43610292	S025	196	Yes	A
RET-intergenic(ACTR3BP5,LOC441666)	R11:intergenic	10:43610945_10:42643766	S032	52	No	C
NCOA4-RET	N7:R12	10:51582378_10:43611265	S032	13	Yes	C
RET-intergenic(MBL2,PCDH15)	R11:intergenic	10:43610213_10:54726044	S007	452	No	C
CCDC6-RET	C1:R12	10:43610217_10:61628422	S007	359	Yes	A
RET-intergenic(ZNF32,C10orf142)	R11:intergenic	10:43611284_10:44466633	S008	86	No	C
KIF5B-RET	K22:R12	10:32307117_10:43611295	S008	74	Yes	A
RET-intergenic(BICC1,PHYHIPL)	R11:intergenic	10:43609962_10:60865858	S009	456	No	C
CCDC6-RET	C1:R12	10:43609990_10:61652746	S009	618	Yes	A
KIF5B-RET	K15:R12	10:32315138_10:43611301	S010	86	Yes	A
RET-intergenic(RP11-508N22.2,LINC00999)	R11:intergenic	10:43611302_10:38703110	S010	29	No	C
RET-ARHGAP12	R11:A12	10:32114092_10:43610272	S014	145	No	B
KIF5B-RET	K15:R12	10:32316149_10:43610292	S014	256	Yes	A
RET-intergenic(ARHGAP12,KIF5B)	R11:intergenic	10:43610455_10:32295931	S015	470	No	C
KIF5B-RET	K15:R12	10:32312291_10:43610473	S015	285	Yes	A
RET-C2orf74	R9:C5'UTR	10:43609082_2:61376924	S016	52	No	B
CNTNAP2-RET	C1:R11	7:146008168_10:43609096	S016	170	Yes	B
CCDC6-RET	C1:R12	10:43611611_10:61664047	S016	525	Yes	A
KIF5B-RET	K15:R12	10:32312710_10:43611853	S002	180	Yes	A
ZNF487-RET	Zintergenic:R12	10:43923008_10:43611853	S002	96	Yes	B
CXCL12-RET	Cintergenic:R12	10:44966425_10:43611954	S004	22	Yes	B
CCDC6-RET	C1:R12	10:61661445_10:43611966	S004	35	Yes	B
RET-intergenic(LINC01518,LOC283028)	R11:intergenic	10:43237041_10:43610896	S037	109	No	C
KIF5B-RET	K15:R12	10:32314847_10:43610911	S037	805	Yes	A
KIF5B-RET	K16:R12	10:32311094_10:43610731	S038	140	Yes	A
KIF5B-RET	K15:R12	10:32315524_10:43610737	S038	73	Yes	A
RET-intergenic(SLC7A13,WWP1)	R11:intergenic	10:43610397_8:87292386	S039	412	No	C
KIF5B-RET	K15:R12	10:32312703_10:43610424	S039	1218	Yes	A
RET-intergenic(ZWINT,MIR3924)	R11:intergenic	10:43611474_10:58594125	S040	62	No	C
KIF5B-RET	K21:R12	10:32307397_10:43611479	S040	157	Yes	A
RET-intergenic(FAM25BP,SHLD2P3)	R11:intergenic	10:43610626_10:47358107	S043	63	No	C
KIF5B-RET	K15:R12	10:32313329_10:43610638	S043	16	Yes	C
LINC02242-RET	L1:R12	5:66941249_10:43610765	S045	21	Yes	B
RET-intergenic(CD180,LINC02242)	R11:intergenic	10:43611796_5:66655573	S045	24	No	C
KIF13A-RET	K18:R12	6:17807824_10:43611823	S045	28	Yes	B
RET-intergenic(MYRFL,CNOT2-DT)	R11:intergenic	10:43610197_12:70457472	S046	100	No	C
MYRFL-RET	M22:R12	12:70350003_10:43610214	S046	210	Yes	B
RET-intergenic(NRG3,LINC02650)	R11:intergenic	10:43610486_10:85335637	S049	202	No	C
GPHN-RET	G16:R12	14:67588560_10:43610505	S049	175	Yes	B
FAM107B-RET	F1:R8	10:14812710_10:43606824	S055	77	Yes	B
RET-intergenic(NRP1,LINC00838)	R11:intergenic	10:43610956_10:33743267	S055	26	No	C
KIF5B-RET	K15:R12	10:32314244_10:43610973	S055	44	Yes	B
FRMD4A-RET	F3:R12	10:13844773_10:43610210	S065	116	Yes	B
KIF5B-RET	K22:R12	10:32307227_10:43610228	S065	128	Yes	A
KIF5B-RET	K15:R8	10:32312921_10:43607050	S067	8	Yes	C
KIF5B-RET	K15:R12	10:32315737_10:43610965	S067	56	Yes	A
RET-intergenic(CTBP2,TEX36-AS1)	R11:intergenic	10:43610732_10:127242925	S068	29	No	C
CCDC6-RET	C1:R12	10:61635773_10:43610821	S068	25	Yes	B
RET-CCSER2	R11:C10	10:43610894_10:86267888	S035	39	No	B
KIF5B-RET	K15:R12	10:32316954_10:43610902	S035	42	Yes	B
Detailed information of multiple RET fusion events in 31 patients, including fusion partner, fusion site, breakpoint, sample, supporting read counts, RET kinase domain retention, and classification.

## Sheet: Supplementary Table 2
Supplementary Table 2. Distribution and classification of RET fusion partners in the study cohort.
Fusion partner	Count	Percentage	Classification of fusion partners
KIF5B	51	0.3806	Common
Intergenic	27	0.2015	Rare
CCDC6	23	0.1716	Common
NCOA4	3	0.0224	Rare
CCDC88C	2	0.0149	Rare
ARHGAP12	2	0.0149	Rare
ERC1	2	0.0149	Rare
CUX1	2	0.0149	Rare
GPHN	2	0.0149	Rare
KIF13A	2	0.0149	Rare
MTUS1	1	0.0075	Novel
ABHD3	1	0.0075	Rare
NPAS3	1	0.0075	Rare
C10orf40	1	0.0075	Rare
ZNF487	1	0.0075	Rare
CXCL12	1	0.0075	Rare
C16orf95	1	0.0075	Novel
C2orf74	1	0.0075	Rare
CNTNAP2	1	0.0075	Rare
CARNMT1-AS1	1	0.0075	Novel
PRKAR1A	1	0.0075	Rare
CCSER2	1	0.0075	Rare
LINC00857	1	0.0075	Rare
LINC02242	1	0.0075	Rare
MYRFL	1	0.0075	Novel
FAM107B	1	0.0075	Novel
RELCH	1	0.0075	Rare
FRMD4A	1	0.0075	Rare
The table presents the absolute count and corresponding percentage of each RET fusion partner identified in RET fusion-positive NSCLC patients. All fusion partners are categorized into three groups: Common, Rare, and Novel, based on their frequency in the cohort.
